# Supplementary material
Source: PubMed Central journal article supplement (PMC6299845)
Supplement: Supp_Table1.pdf [file Supp_Table1.pdf]

## Supplementary Data

SUPPLEMENTARY TABLE S1. DETAILED RESPONSES OF PROVIDER USAGE  
AND OPINIONS OF EXISTING DIABETES DATA SOFTWARE

| <i>Use of current software</i> | <i>Percent (%) of HCPs reporting</i> |               |                  |                         |                          |                    |
|--------------------------------|--------------------------------------|---------------|------------------|-------------------------|--------------------------|--------------------|
|                                | <i>Never</i>                         | <i>Rarely</i> | <i>Sometimes</i> | <i>Most of the time</i> | <i>Almost every time</i> | <i>Every visit</i> |
| Use data in clinic visits      | 0                                    | 20            | 20               | 20                      | 27                       | 33                 |
| View data in hardcopy          | 7                                    | 7             | 40               | 33                      | 0                        | 13                 |
| View data in native software   | 27                                   | 27            | 33               | 13                      | 0                        | 0                  |

  

| <i>Opinion of importance</i>             | <i>Not at all important</i> | <i>Somewhat important</i> | <i>Very important</i> | <i>Essential</i> |
|------------------------------------------|-----------------------------|---------------------------|-----------------------|------------------|
| Having contextual data                   | 0                           | 17                        | 60                    | 33               |
| Viewing all data in one application      | 0                           | 20                        | 40                    | 40               |
| Logging in to as few systems as possible | 0                           | 20                        | 53                    | 27               |
| Integration of data with the EHR         | 7                           | 20                        | 47                    | 27               |
| Automated device download                | 0                           | 33                        | 47                    | 20               |
| Having a standardized view of data       | 0                           | 40                        | 20                    | 40               |
| Using hardcopies of data                 | 27                          | 47                        | 20                    | 7                |

  

| <i>Opinion of current software</i>                | <i>Strongly disagree</i> | <i>Disagree</i> | <i>Neither agree nor disagree</i> | <i>Agree</i> | <i>Strongly agree</i> |
|---------------------------------------------------|--------------------------|-----------------|-----------------------------------|--------------|-----------------------|
| Difficult to gather contextual data from patients | 0                        | 13              | 7                                 | 53           | 27                    |
| Easy to integrate data from multiple devices      | 27                       | 40              | 13                                | 13           | 7                     |
| Easy to recognize patterns in the data            | 0                        | 40              | 33                                | 20           | 7                     |
