# Supplementary material
Source: PubMed Central journal article supplement (PMC6299845)
Supplement: Supp_Table2.pdf [file Supp_Table2.pdf]

SUPPLEMENTARY TABLE S2. PROVIDER PERCEIVED EASE OF USE OF THE NEW APPLICATION

|                                                                               | <i>3 Months</i> | <i>6 Months</i> |
|-------------------------------------------------------------------------------|-----------------|-----------------|
| Reduced the TIME it took to review diabetes data in clinic visits             | 3.64 (0.92)     | 3.5 (0.93)      |
| Made it easier to SEE diabetes data                                           | 3.82 (1.08)     | 4.00 (0.53)     |
| Made it easier for me to UNDERSTAND diabetes data                             | 3.64 (1.03)     | 3.50 (0.93)     |
| Made it easier to review CONTEXT (food, activity, illness) with diabetes data | 3.36 (0.92)     | 3.23 (1.04)     |
| Made it easier for my patients to SHARE their diabetes data with me           | 4.09 (0.70)     | 3.88 (0.64)     |
| Made it easier for me to COMMUNICATE with my patients about diabetes data     | 3.82 (0.98)     | 3.75 (0.71)     |
| Made it easier for my PATIENTS to see and understand their data               | 4.00 (1.05)     | 4.13 (0.83)     |

Mean (standard deviation) scores (1 = strongly disagree, 2 = disagree, 3 = neither agree nor disagree, 4 = agree, 5 = strongly agree). The 3-month and 6-month means were compared by *t* test, and all  $p > 0.05$ .
